# Supplementary material
Source: bioRxiv or medRxiv preprint supplement (https://www.biorxiv.org/highwire/filestream/118625/field_highwire_adjunct_files/2/391268-3.pdf)

IBD>0.05

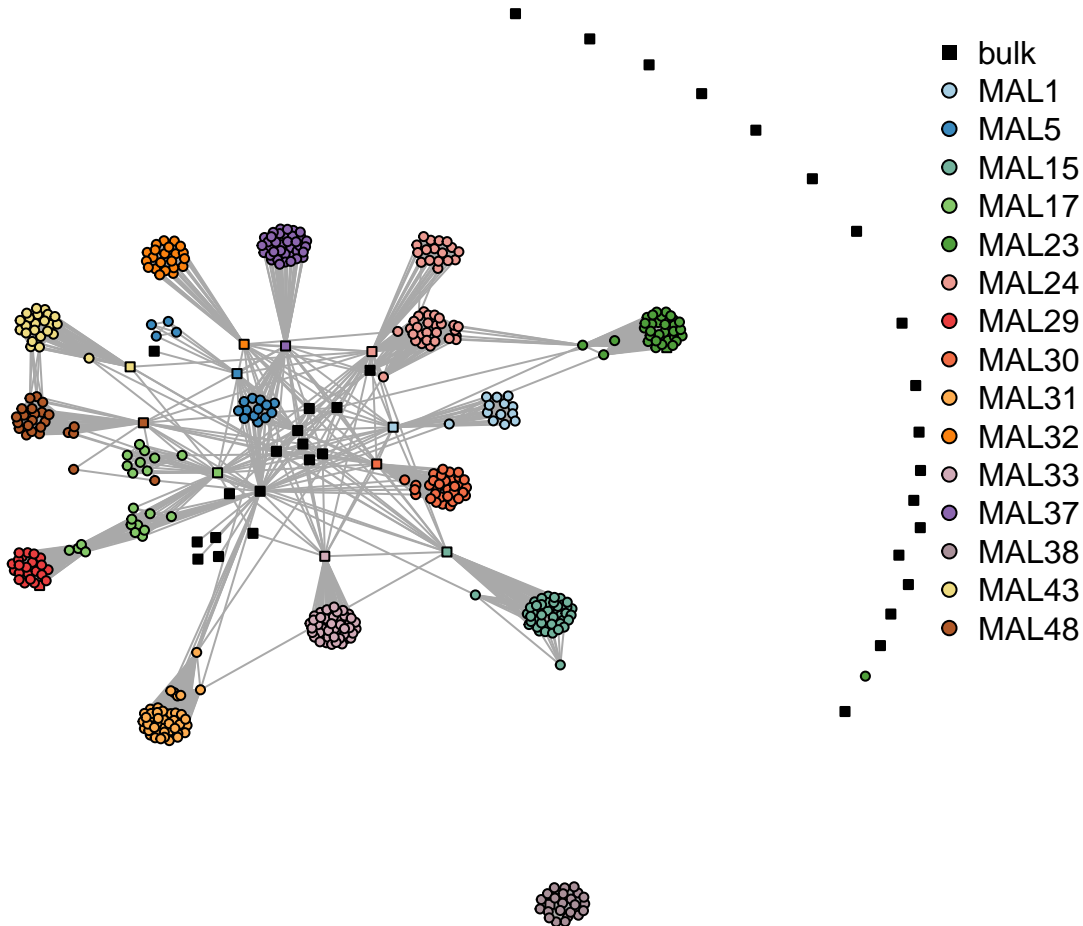

IBD>0.1

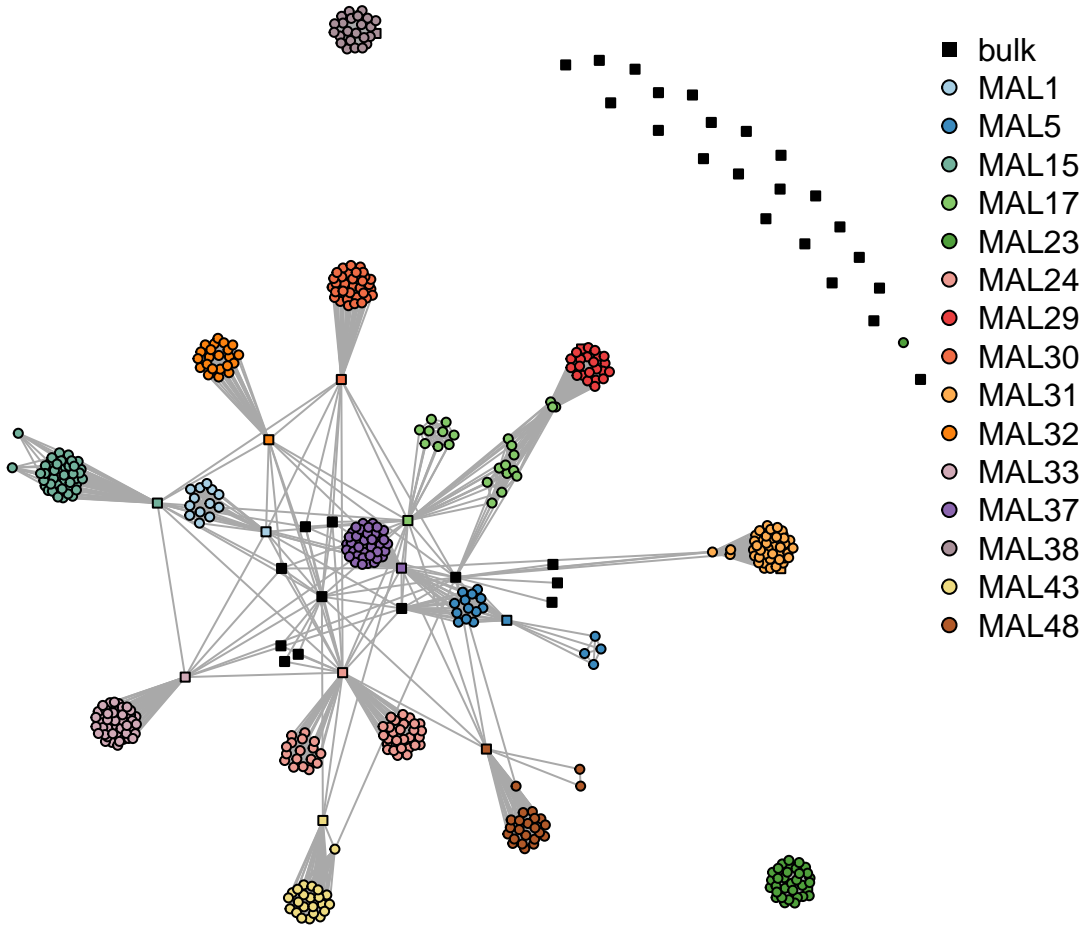

IBD>0.15

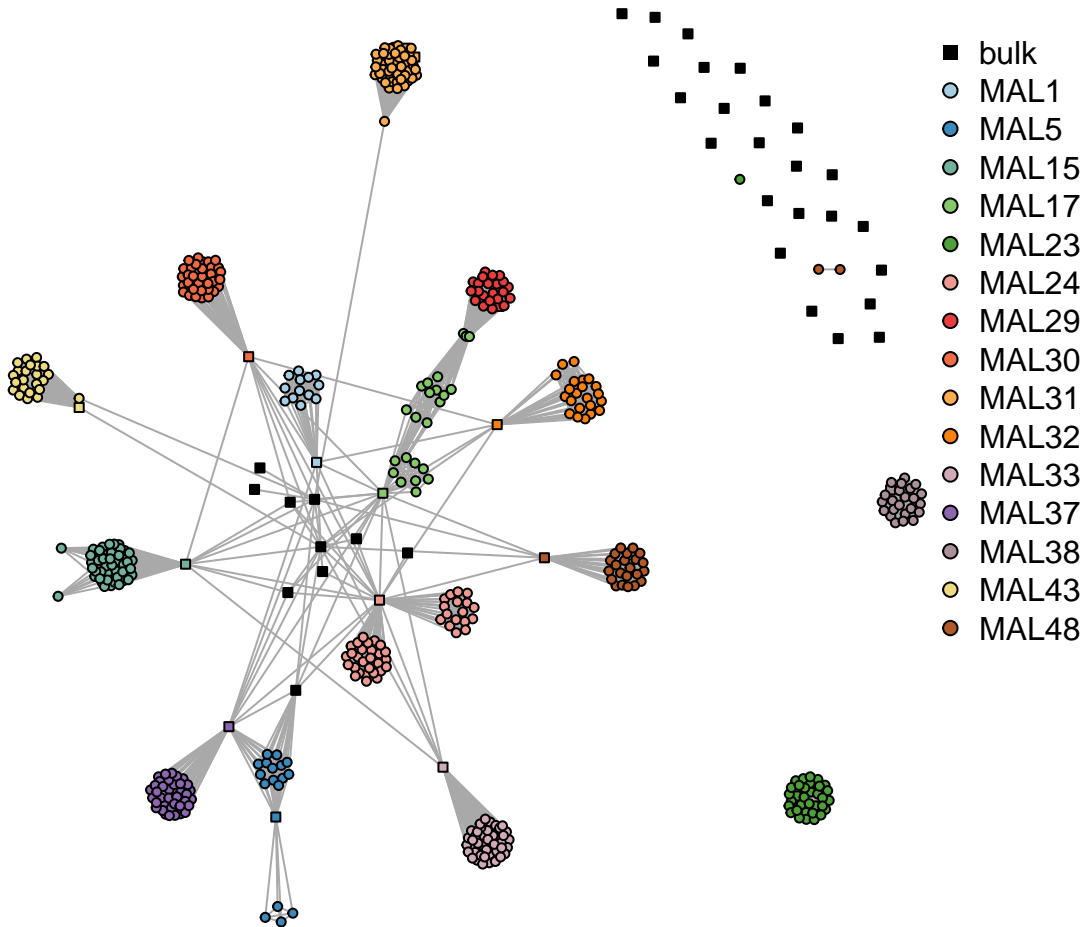

IBD>0.2

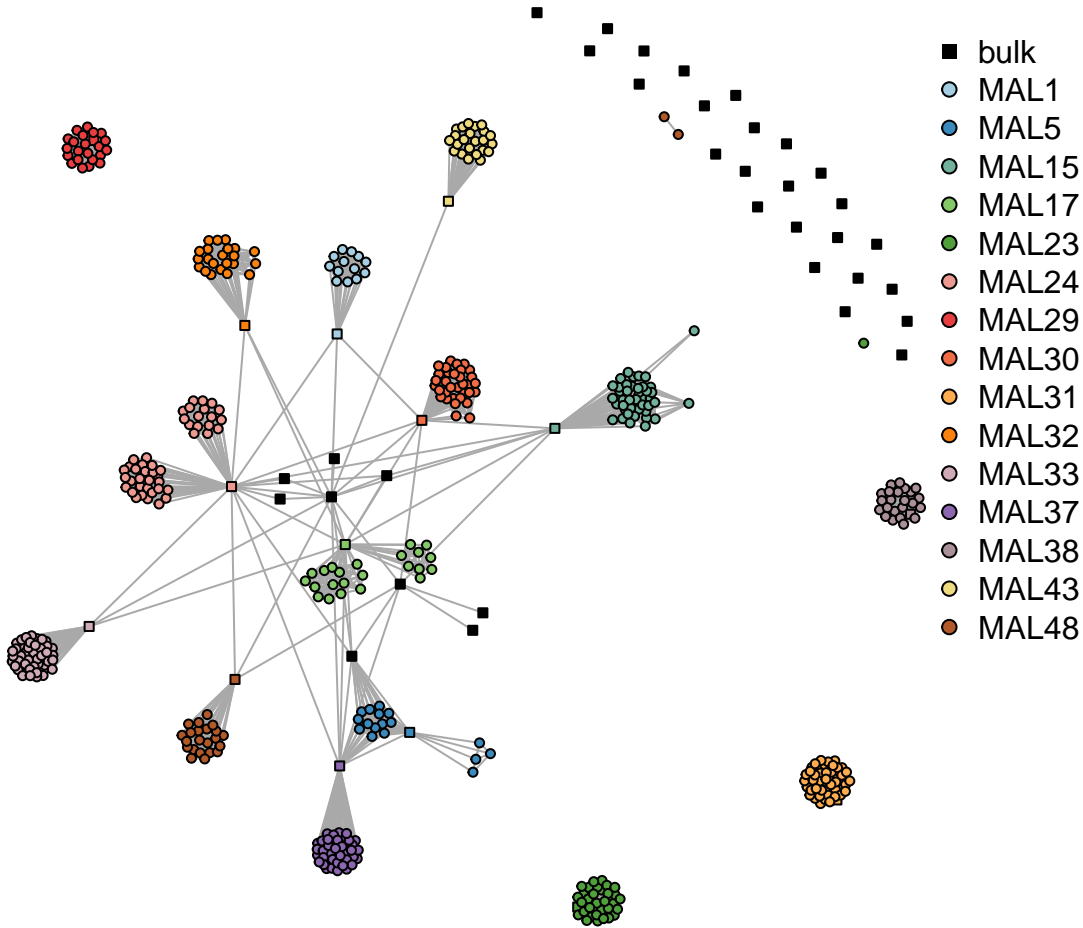

IBD>0.25

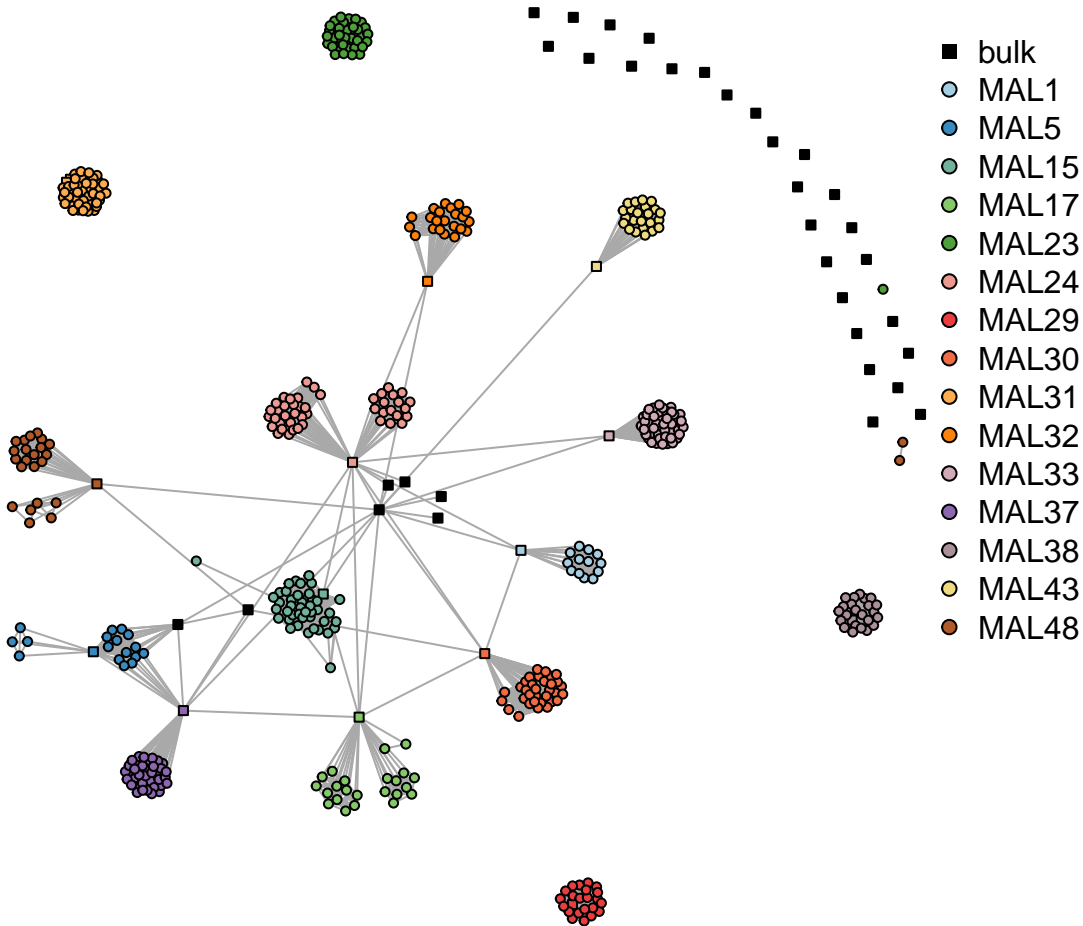

IBD>0.3

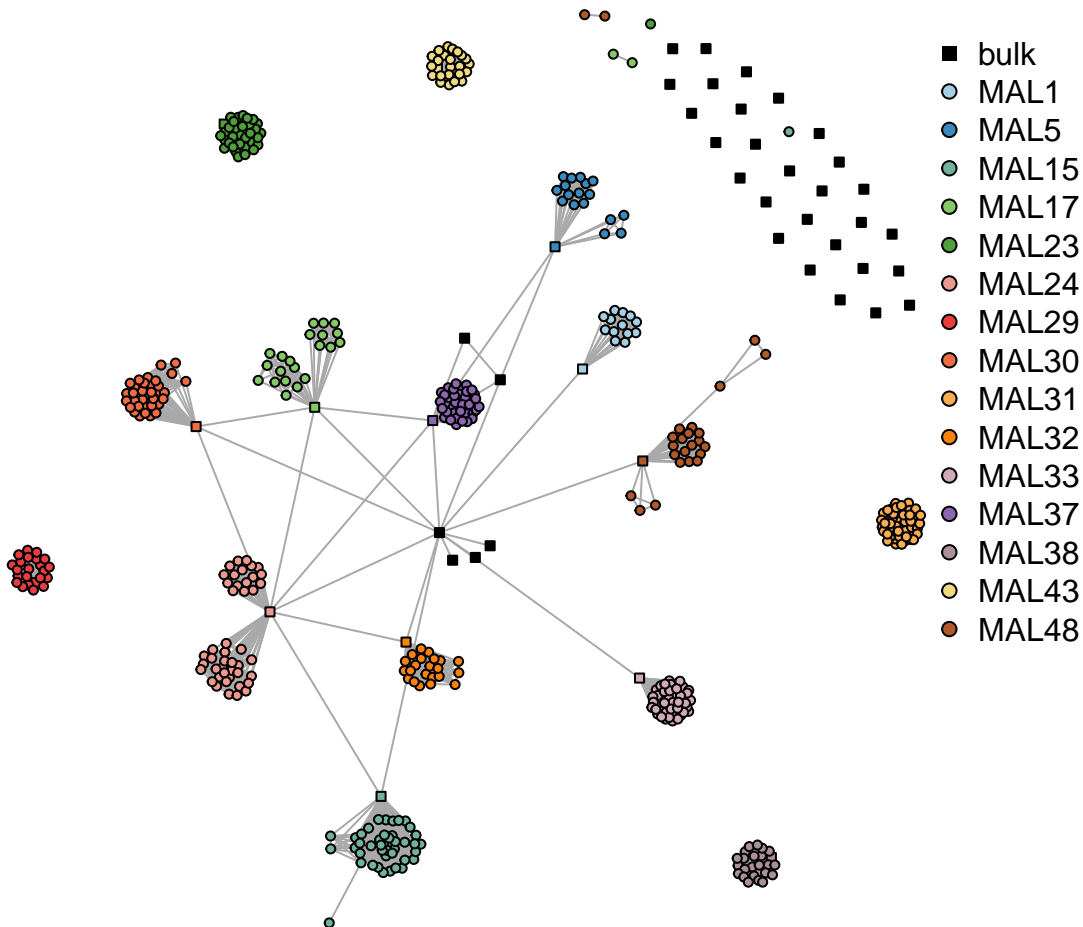

IBD>0.35

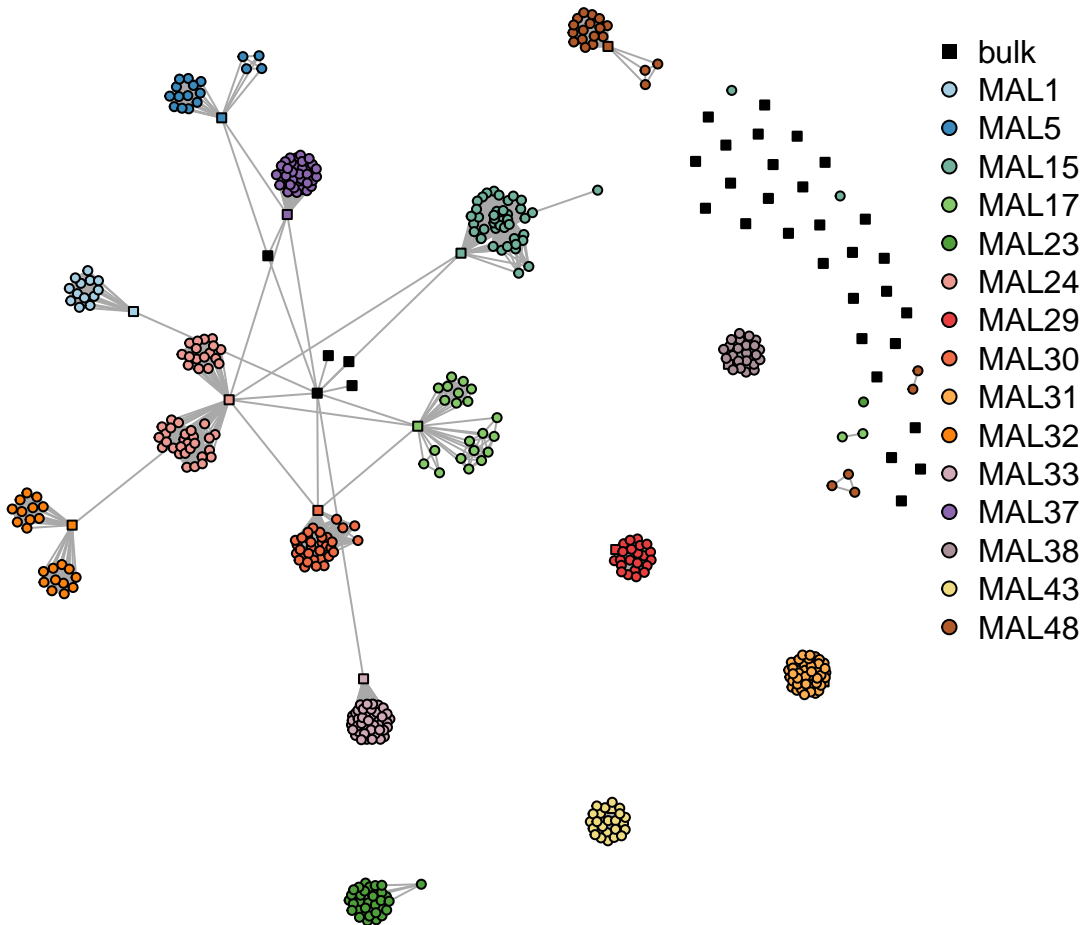

IBD>0.4

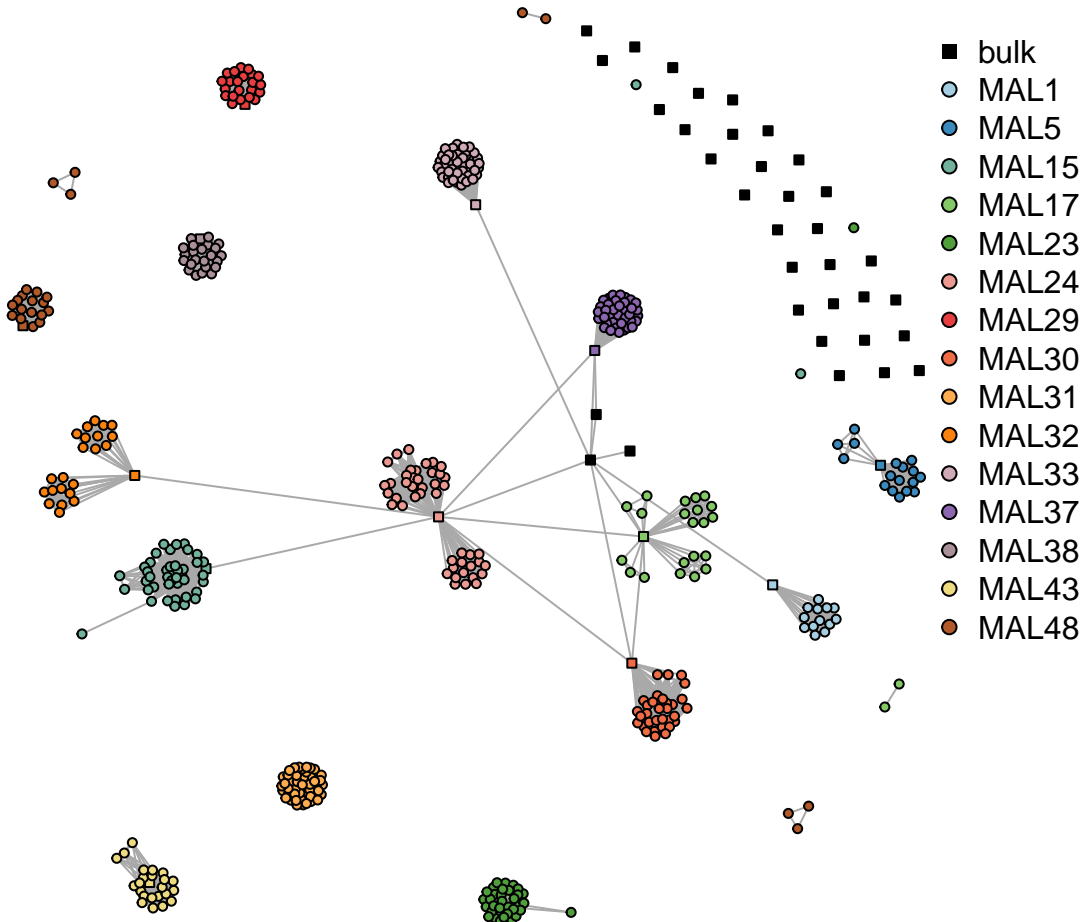



IBD>0.45

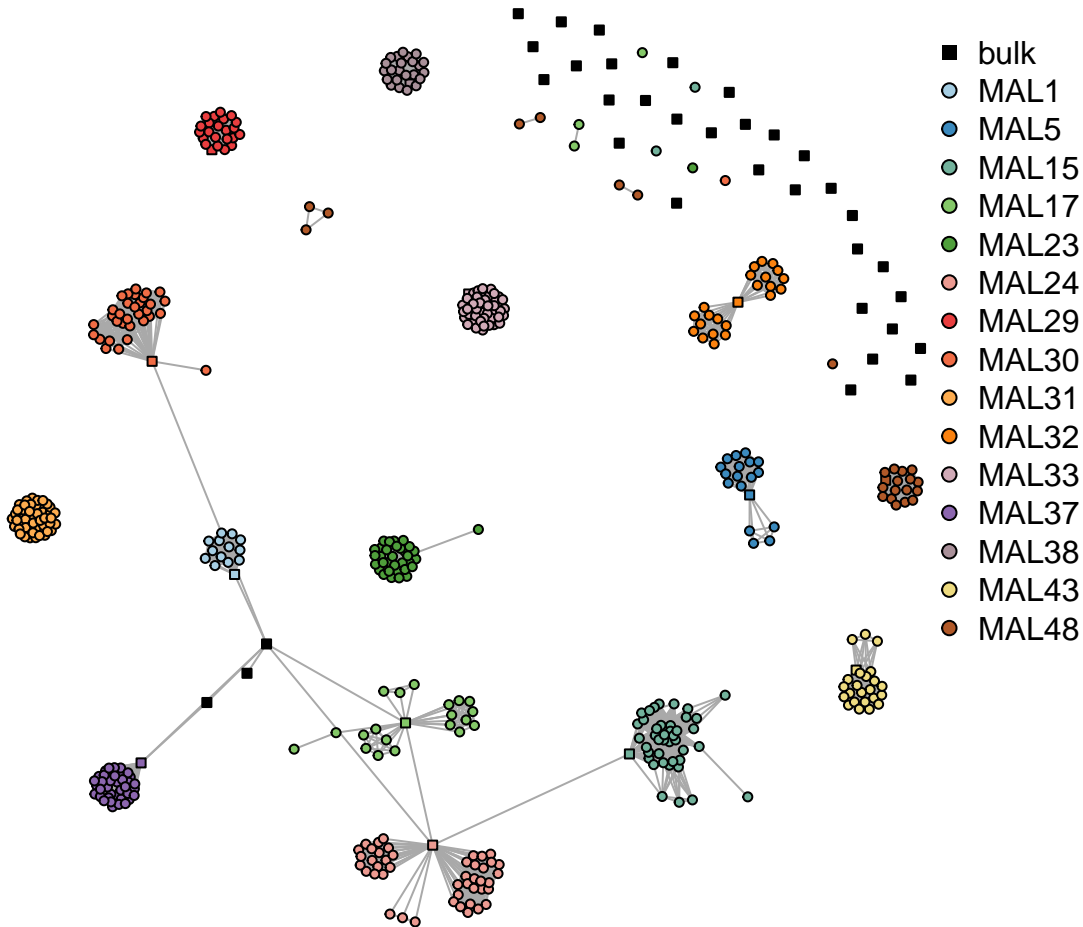

IBD>0.5

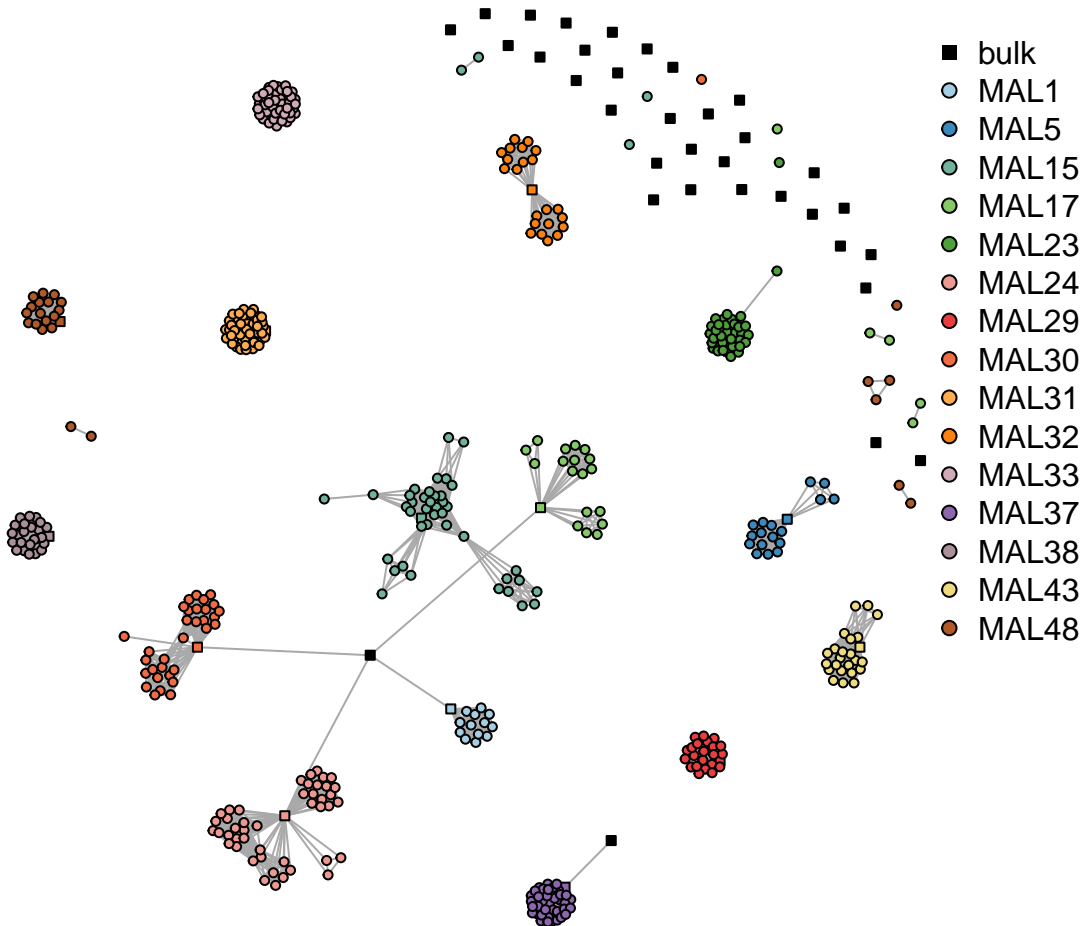

IBD>0.55

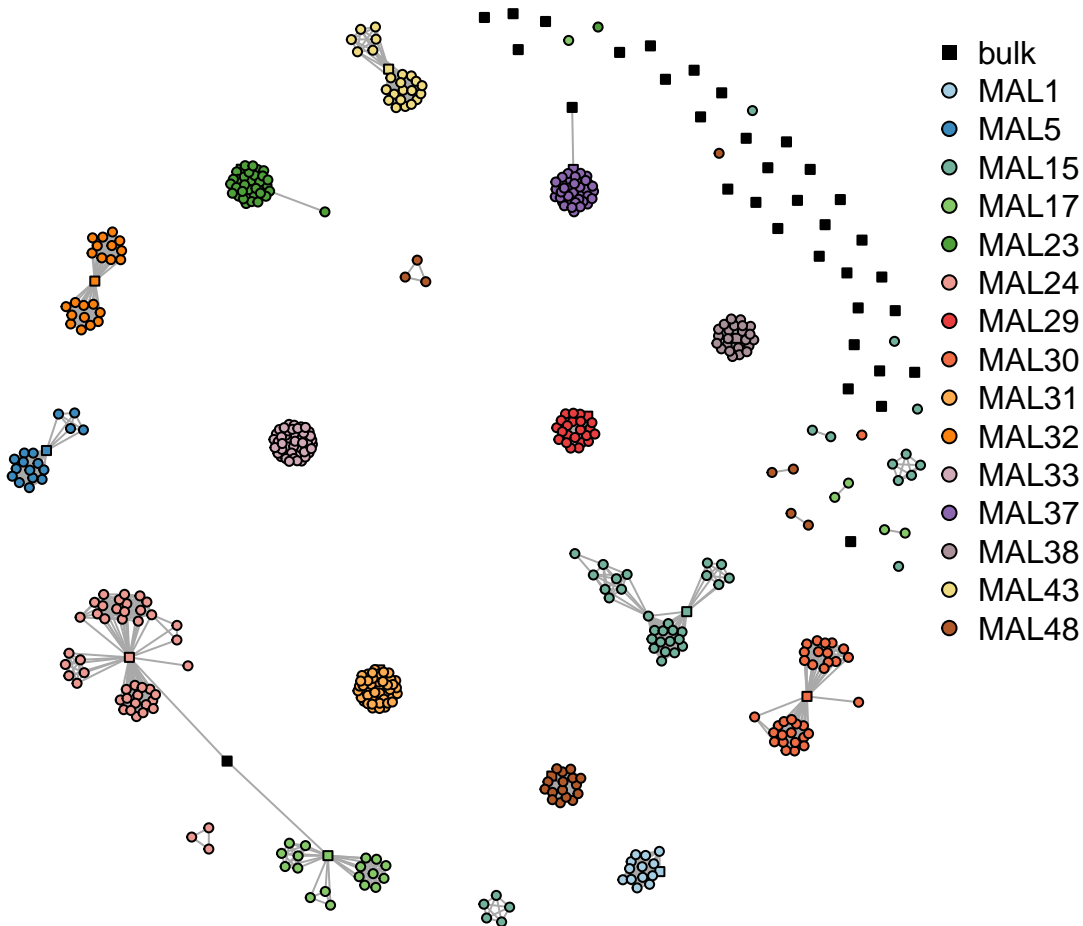

IBD>0.6

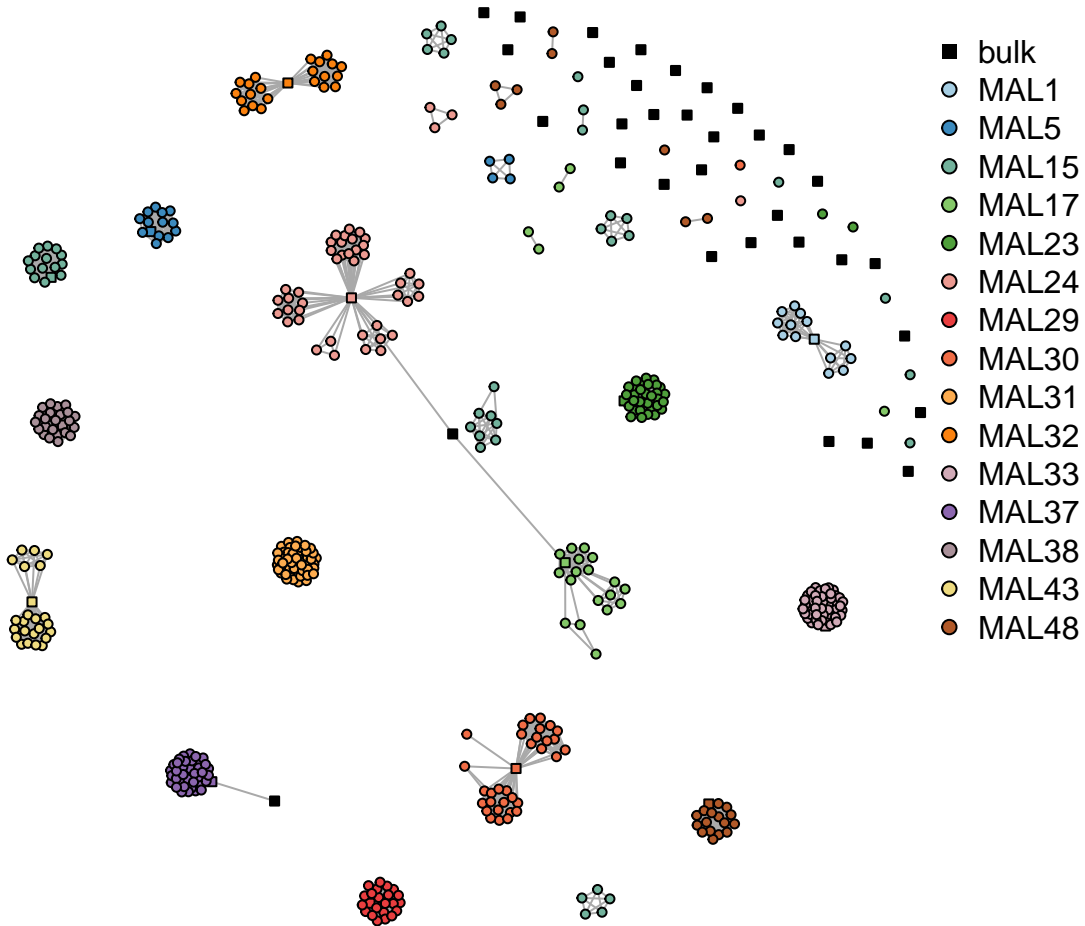

IBD>0.65

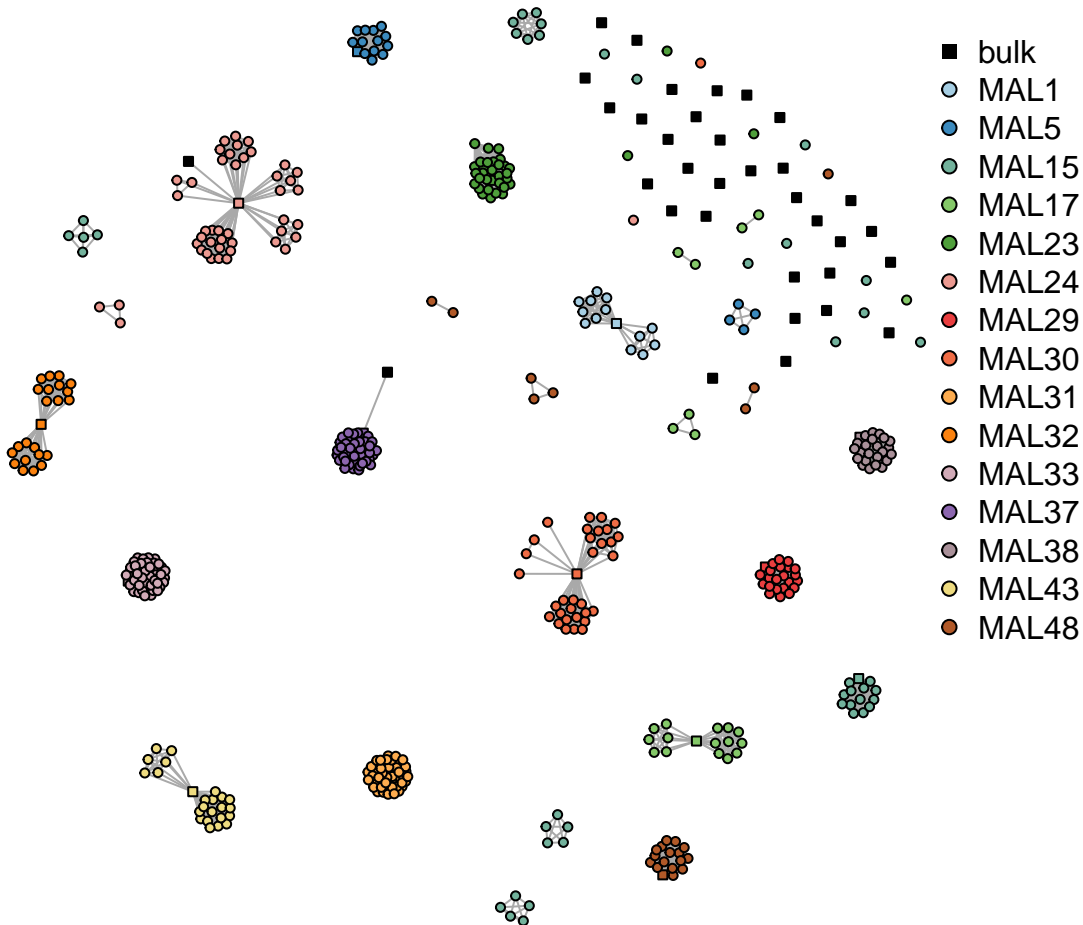

IBD>0.7

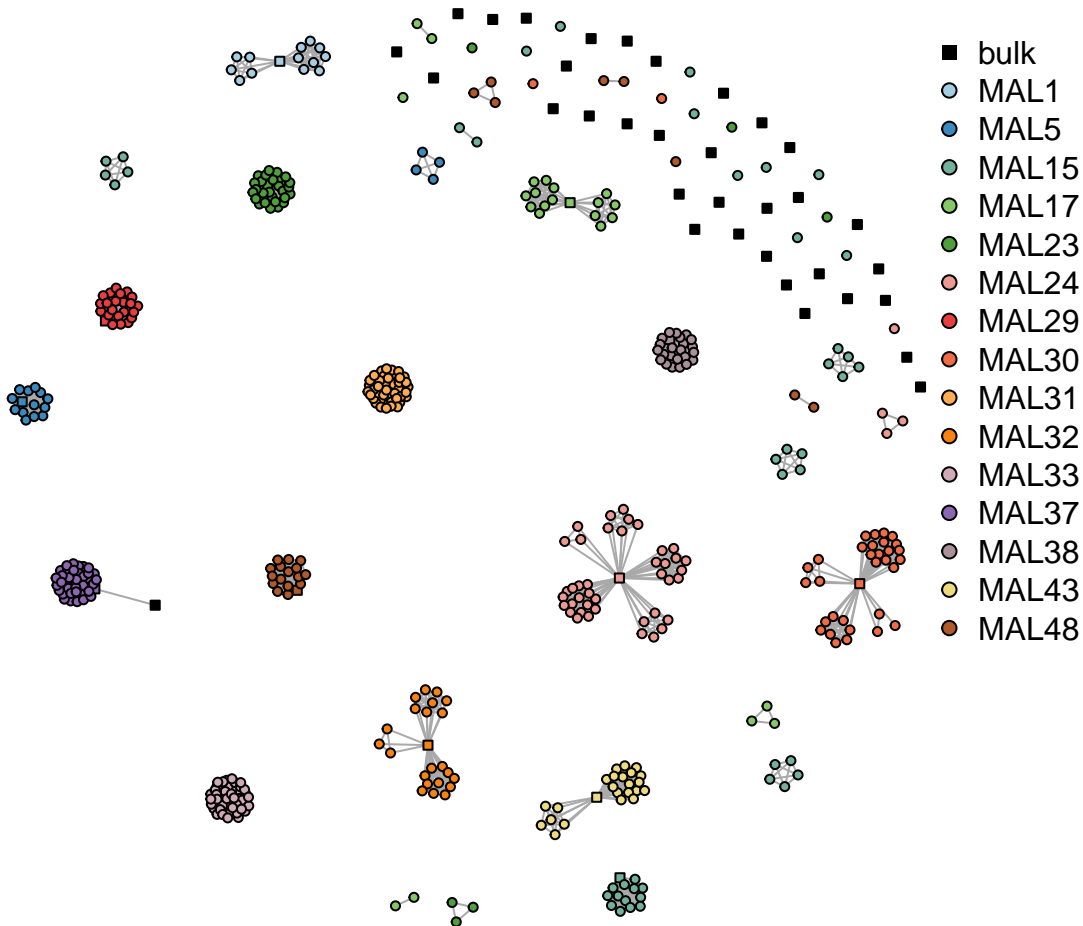

IBD>0.75

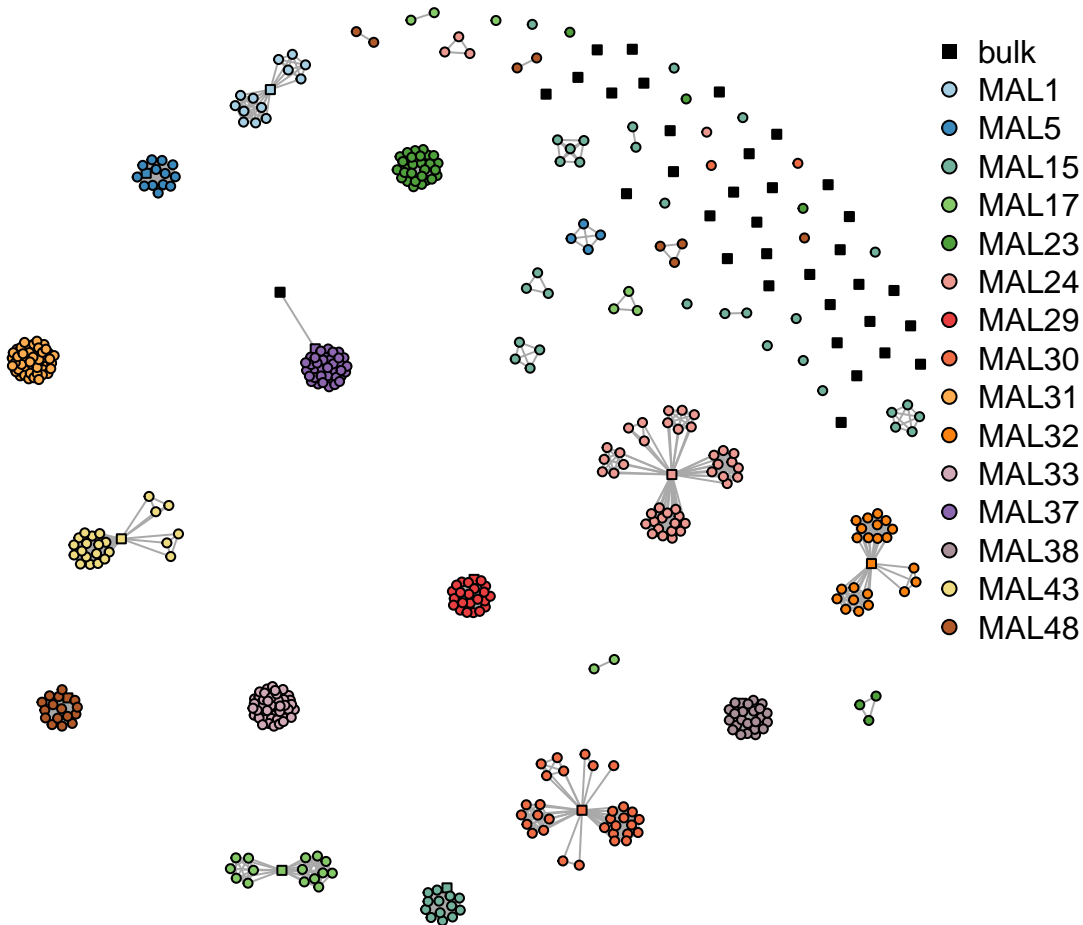

IBD>0.8

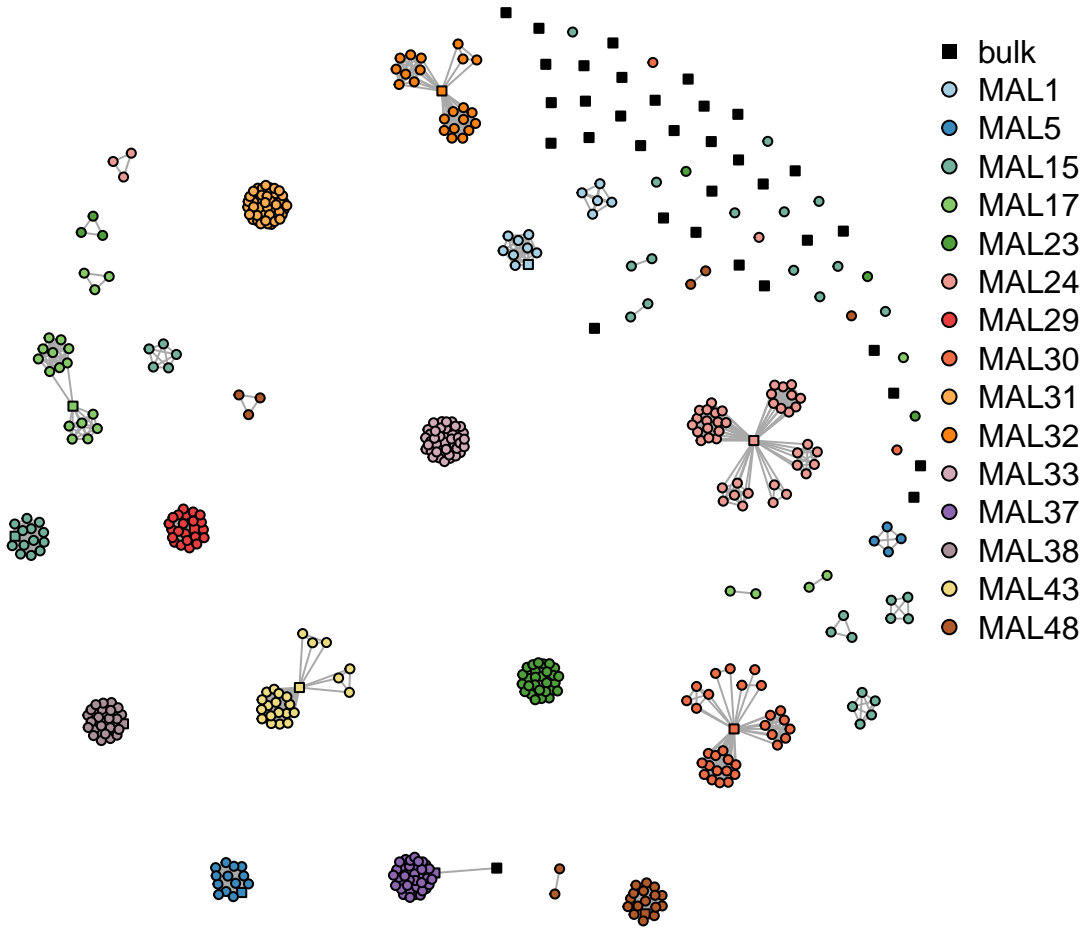



IBD>0.85

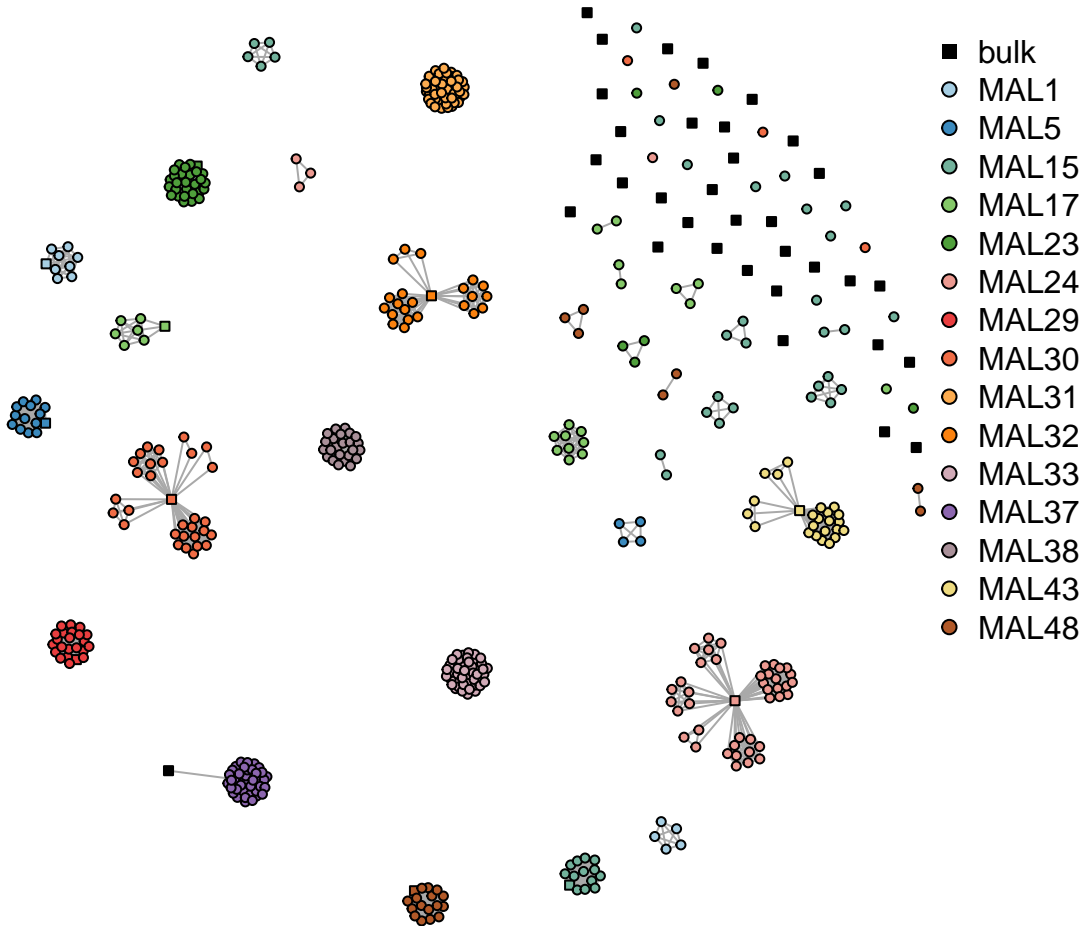

IBD>0.9

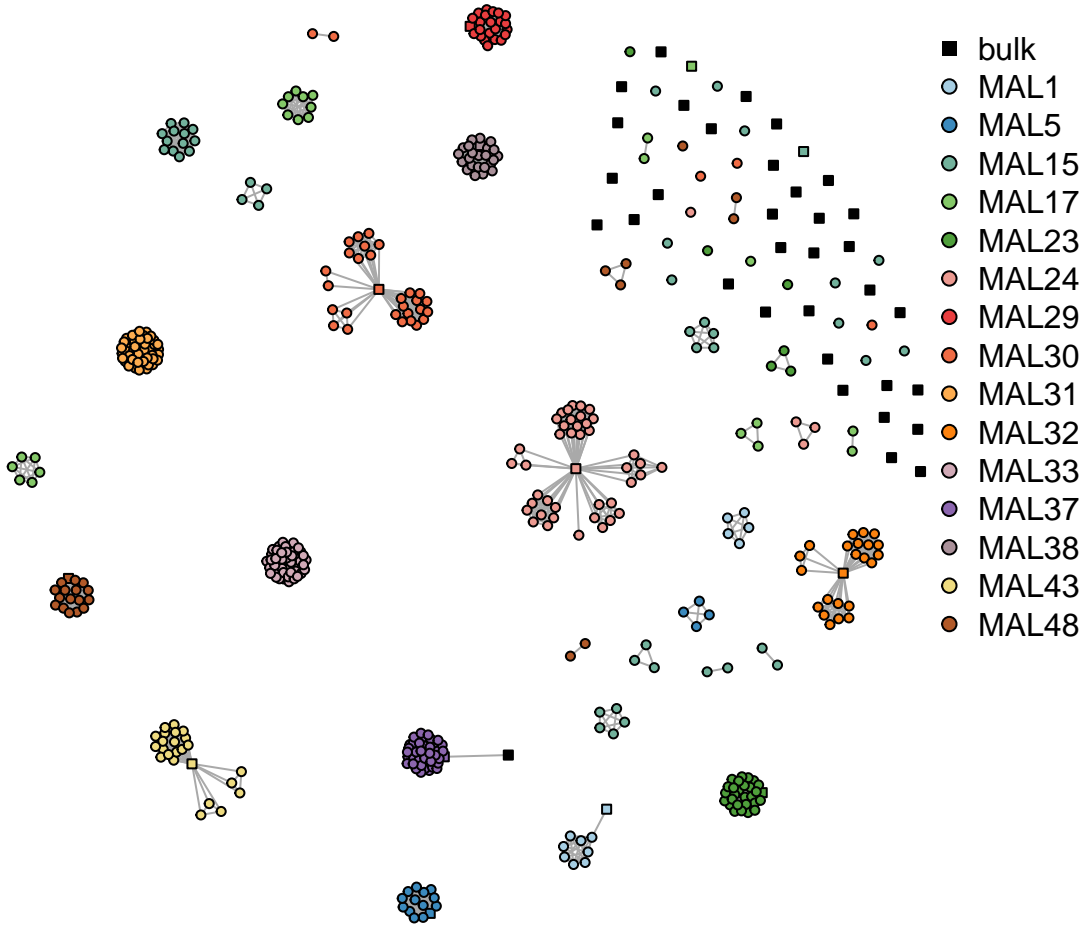

IBD>0.95

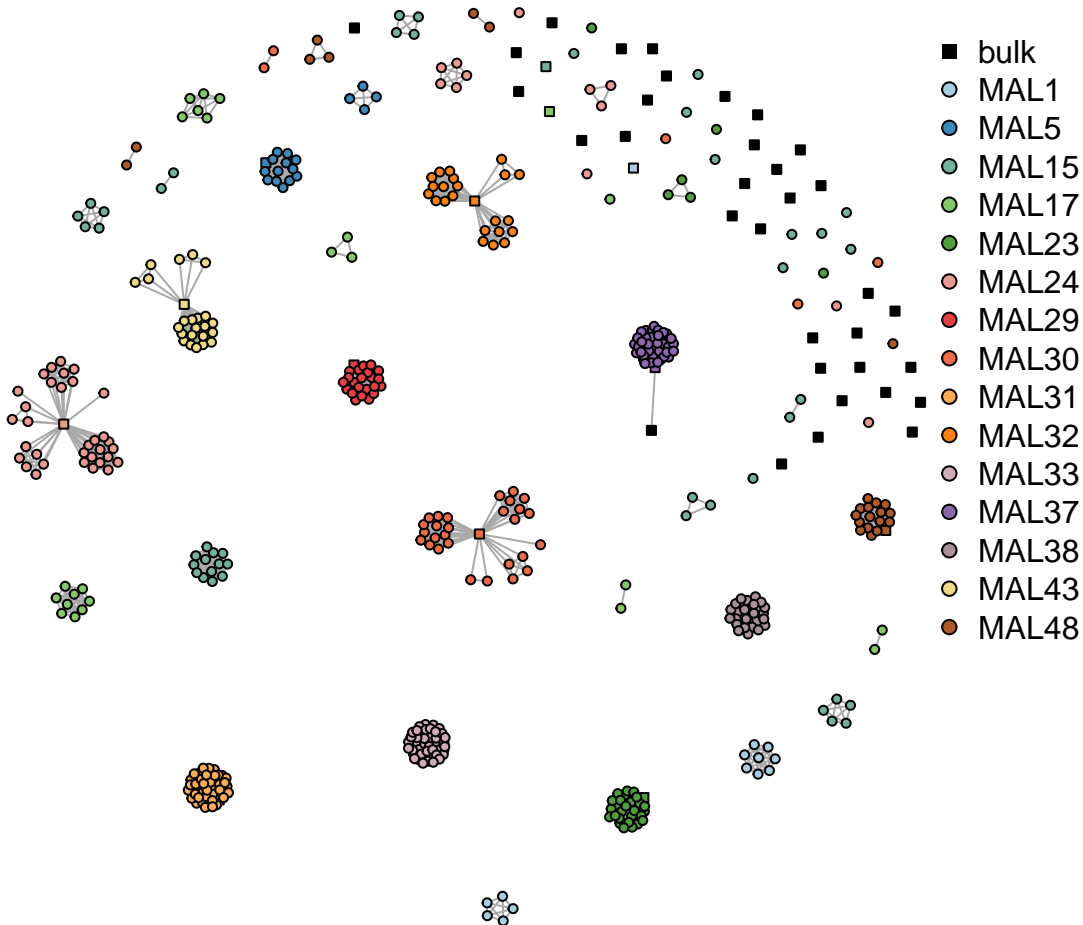

IBD>1

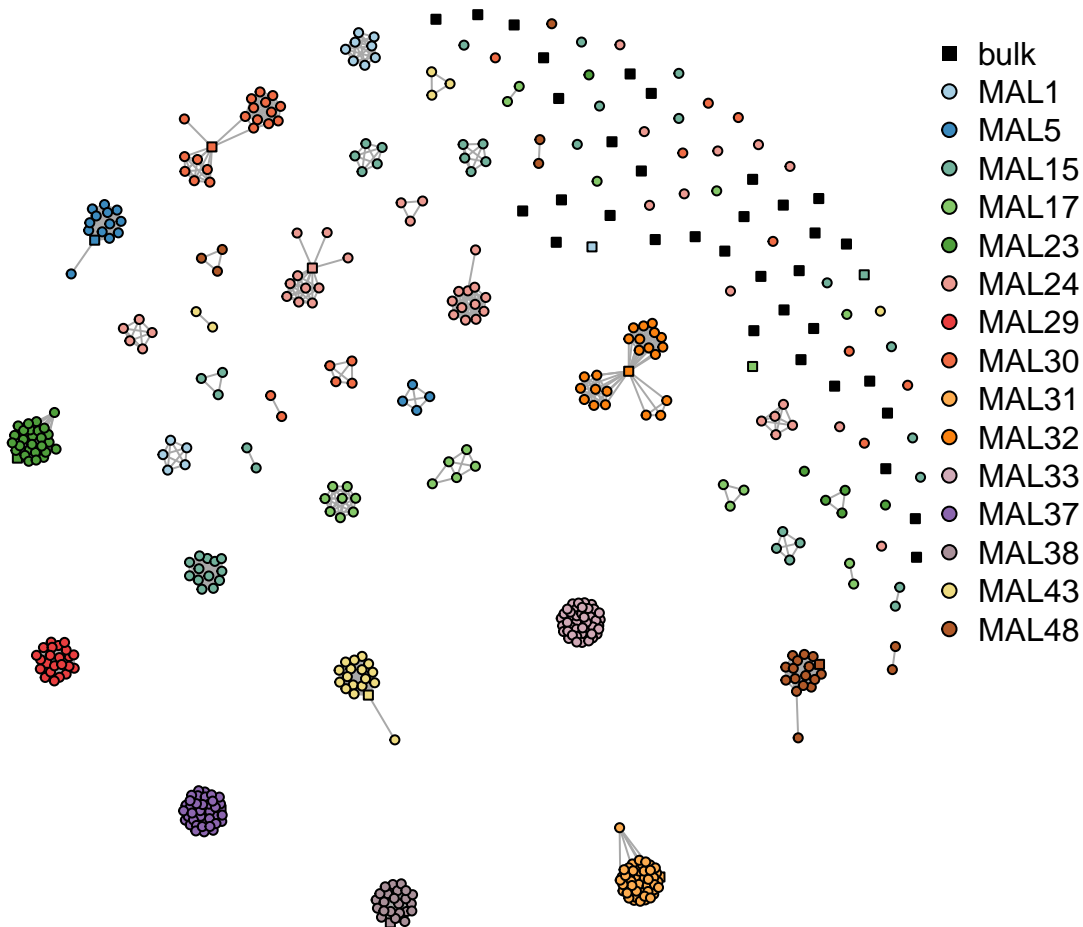

Supplement: Supplementary file [file 391268-3.pdf]
